# Supplementary material for: Seven gene deletions in seven days: Fast generation of Escherichia coli strains tolerant to acetate and osmotic stress
Source: PubMed Central journal article supplement (PMC4672327; doi:10.1038/srep17874), 2015-12-08
Supplement: srep17874-s1.pdf [file srep17874-s1.pdf]

**Seven gene deletions in seven days:  
Fast generation of *Escherichia coli* strains tolerant to acetate and osmotic stress**  
Sheila I. Jensen<sup>1\*</sup>, Rebecca M. Lennen<sup>1</sup>, Markus J. Herrgård<sup>1</sup>, Alex T. Nielsen<sup>1\*</sup>

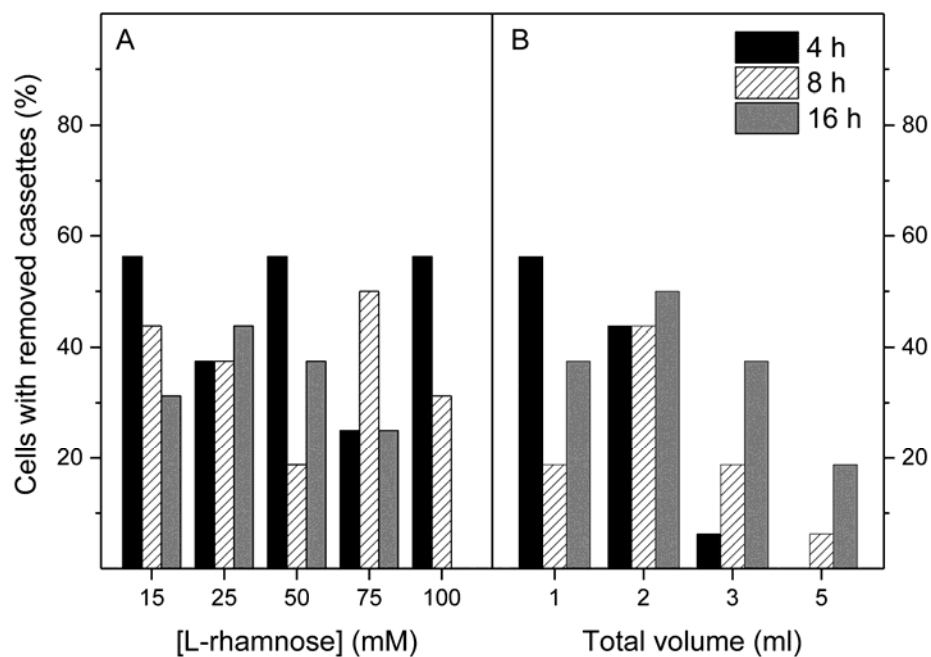

**Supplementary Figure S1.** Efficiency in percent of simultaneous excision of different integrated antibiotic cassettes in strain SIJ488 induced for 4 h (black bars), 8 h (stripes) or 16 h (grey). A) Efficiency using different concentrations of rhamnose. B) 50 µl growing cell culture inoculated into 1 ml, 2 ml, 3 ml or 5 ml LB and induced with 50 mM rhamnose (n=16).

**Supplementary Table S1.** Precursor strains and plasmids used in this study.

| Strain          | Genotype                                                                             | Reference                             |
|-----------------|--------------------------------------------------------------------------------------|---------------------------------------|
| XL-1 blue       | recA1 endA1 gyrA96 thi-1 hsdR17 supE44 relA1<br>lac [F'proAB lacIqZΔM15 Tn10 (Tetr)] | Agilent technologies                  |
| DH5α λpir       | λpir lysogen of DH5α                                                                 | V. de Lorenzo <sup>2</sup>            |
| Plasmid         | Description                                                                          | Reference                             |
| <b>Plasmids</b> |                                                                                      |                                       |
| pKD46           | Ap <sup>R</sup> , oriR101, repA101 <sup>TS</sup> , araC-ParaB::gam-beta-exo          | (Datsenko and Wanner 2000)            |
| pEMG            | Km <sup>R</sup> , oriR6K, lacZα, two I-SceI sites                                    | (Martinez-Garcia and de Lorenzo 2011) |
| pSEVA 631       | Gm <sup>R</sup> , oripBBR1, oriT                                                     | (Silva-Rocha et al. 2013)             |
| pSEVA 441       | sm <sup>R</sup> , oripRO1600/ColE1, oriT                                             | (Silva-Rocha et al. 2013)             |
| pFLP2           | Ap <sup>R</sup> , ori1600, oriT, rep, cl857-FLP, sacB                                | (Hoang et al. 1998)                   |
| pSW-1           | Ap <sup>R</sup> , oriRK2, xylS, Pm-I-sceI                                            | (Wong and Mekalanos 2000)             |
| pSIJ_180        | pEMG ap <sup>R</sup> , frt::cm::frt                                                  | This study                            |

<sup>2</sup>This strain was generously donated by V. de Lorenzo, Centro Nacional de Biotecnología-CSIC, Madrid, Spain

- Datsenko KA, Wanner BL. 2000. One-step inactivation of chromosomal genes in *Escherichia coli* K-12 using PCR products. *Proc. Natl. Acad. Sci.* 97(12):6640-6645.
- Hoang TT, Karkhoff-Schweizer RR, Kutchma AJ, Schweizer HP. 1998. A broad-host-range Flp-FRT recombination system for site-specific excision of chromosomally-located DNA sequences: application for isolation of unmarked *Pseudomonas aeruginosa* mutants. *Gene* 212(1):77-86.
- Martinez-Garcia E, de Lorenzo V. 2011. Engineering multiple genomic deletions in Gram-negative bacteria: analysis of the multi-resistant antibiotic profile of *Pseudomonas putida* KT2440. *Environ Microbiol* 13(10):2702-16.
- Silva-Rocha R, Martinez-Garcia E, Calles B, Chavarria M, Arce-Rodriguez A, de Las Heras A, Paez-Espino AD, Durante-Rodriguez G, Kim J, Nickel PI and others. 2013. The Standard European Vector Architecture (SEVA): a coherent platform for the analysis and deployment of complex prokaryotic phenotypes. *Nucleic Acids Res* 41(Database issue):D666-75.
- Wong SM, Mekalanos JJ. 2000. Genetic footprinting with mariner-based transposition in *Pseudomonas aeruginosa*. *Proc Natl Acad Sci U S A* 97(18):10191-6.

**Supplementary Table S2: Primers used in this study**

| Primers for deletions and verification | Sequence                                                                         |
|----------------------------------------|----------------------------------------------------------------------------------|
| 662_rfe_EC-W-MG_fw                     | CTTCGTGGTTATACTTCTGCTAATAATTTTCTCTGAGAGCATGCAT<br>TGTGTGTAGGCTGGAGCTGCTTC        |
| 974_rfe_BL21_fw                        | CTTCGTGGTTATACTTCTGCCAATAATTTTCTCTGAGAGCATGCAT<br>TGTGTGTAGGCTGGAGCTGCTTC        |
| 663_rfe_rv                             | AGGCATTGGTTGTGTCATCACATCCTCATTTATTTGGTTAAAATTGG<br>GGCTGCTTGCATATGAATATCCTCCTTAG |
| 664_evga_fw                            | ATTACTACAGGGAGAAGGGAGATGCTTCATTGCAAAGGGAATAAT<br>CTATGTGTAGGCTGGAGCTGCTTC        |
| 665_evga_W_rv                          | GAAAAAATAGGGTAAAAACTTCATGTGATTAGCCGATTTTGTTA<br>CGTTGGCTTGCATATGAATATCCTCCTTAG   |
| 874_evga_MG-BL_rv                      | GAAAAATATAGGGTAAAAACTTCATGTGGTTAGCCGATTTTGTTA<br>CGTTGCTTGCATATGAATATCCTCCTTAG   |
| 666_typA_fw                            | TAATCCGTGTACAATAACGCGCTATTTCTAATGCCTGAGGCAAAGT<br>TGTGTGTAGGCTGGAGCTGCTTC        |
| 667_typA_rv                            | GGCAGGTTTTTATGACTAAAAACGAAATTAATCGTCTTTTCGGT<br>GCGCGGCTTGCATATGAATATCCTCCTTAG   |
| 668_yobF_fw                            | TTGTATGTGATAACAGATTTTCGGGTAAACGAGGTACAGTTCTGT<br>TTATGTGTAGGCTGGAGCTGCTTC        |
| 669_yobF_rv                            | CCTTTAATCTTTGCCATTTGAAAAATTCCTTAGATTGTTTTCTTCG<br>CCCGGCTTGCATATGAATATCCTCCTTAG  |
| 670_ptsP_fw                            | AAAACGCATCTGCTTATCGACGTAAAAGAGGTTAAGTCACGCCAA<br>TTATGTGTAGGCTGGAGCTGCTTC        |
| 671_pstP_rv                            | ACCGTTAAAAGATATGTATATGATCCGCGCTATAACCCCTCCGCGAA<br>TCAGGCTTGCATATGAATATCCTCCTTAG |
| 672_ackA_fw                            | TGGCTCCCTGACGTTTTTTTTAGCCACGTATCAATTATAGGTACTTC<br>CATGTGTAGGCTGGAGCTGCTTC       |
| 673_ackA_rv                            | GCACCGCCAGCTGAGCTGGCGGTGTGAAATCAGGCAGTCAGGCGGC<br>TCGCGCTTGCATATGAATATCCTCCTTAG  |
| 674_yciW_fw                            | CCGCCTTGCCTCAGGATAACGATTTTCCTTTACGACCAAGGAGCGCC<br>CATGTGTAGGCTGGAGCTGCTTC       |
| 675_yciW_rv                            | TTTACGCGAATCTGTCTGACGCGGCAAGGTTAATATGTCTCACCCA<br>ACGCGCTTGCATATGAATATCCTCCTTAG  |
| 975_rfe_seq_fw                         | ACTGGCAATGACCAAGACCA                                                             |
| 976_rfe_seq_rv                         | CCCCAGCATATTCACCGTTG                                                             |
| 977_typA_seq_fw                        | ACGATGTGAATGTTGCACCA                                                             |
| 978_typA_seq_rv                        | GTCATACGTTTAATGCCACG                                                             |
| 979_yciW_seq_fw                        | TCGCCGTACCGTTACTATTGA                                                            |
| 980_yciW_seq_rv                        | TAATTCGGTGCACATGCATG                                                             |
| 981_yobF_seq_fw                        | TAACTTCTCCCACTGGCCTG                                                             |
| 982_yobF_seq_rv                        | TCAGTGGATTCGATCAGATAGCT                                                          |
| 983_evga_seq_fw                        | TGCAATACAATTCTTACGCCTGT                                                          |
| 984_evga_seq_rv                        | TAAGAGGCGGCGAAGTAACT                                                             |
| 985_ptsP_seq_fw                        | GGTTTCTCTTGCAGCTGGTG                                                             |
| 986_ptsP_seq_rv                        | GCCACGGGTCCTATTGAGAA                                                             |
| 987_ackA_seq_fw                        | AGGTATCCTTTAGCAGCCTGA                                                            |
| 988_ackA_seq_rv                        | CCGTCGTGGTGAAGAGTT                                                               |

|                          |                                |
|--------------------------|--------------------------------|
| RL_rfe_colPCR_fwd        | TTGCATATCAAATGGTAAATTTTTGACAG  |
| RL_rfe_colPCR_rev        | CGCCAGCCCCATGCCAAT             |
| RL_evga_colPCR_fwd       | CCGACTATTTATATGGTATACTTGTTCG   |
| RL_evga_colPCR_rev       | CGTAATTCCTTGTTGCTCAGACG        |
| RL_typA_colPCR_fwd       | TGACCTTTGGATAACCCTTTTTATGC     |
| RL_typA_colPCR_rev       | GACAAAGTCTCTATTGACGTAACC       |
| RL_yobF_colPCR_fwd2      | CTGATCGAGACATGTTAAAAATGGC      |
| RL_yobF_colPCR_rev       | TTCAGCCAGAGTTTTGAAGCCATTA      |
| RL_ptsP_colPCR_fwd       | GTGGTGTCAATTAACGTGATGTC        |
| RL_ptsP_colPCR_rev       | CTGTCACCACAAGTTCTTGTTATTTC     |
| RL_ackA_colPCR_fwd       | CAAAATGGCATAGACTCAAGATATTTTC   |
| RL_ackA_colPCR_rev       | CGGTAGGGATCAGCATAATAATAC       |
| RL_yciW_colPCR_fwd       | CGTTCTGCCGCCCGTTATC            |
| RL_yciW_colPCR_rev       | TTACCACCCCTTCAGCGCG            |
| 1037_evga_phos-thio_fw   | T*C*GAATTATCTTAAAGGAAGCTCAG    |
| 1038_evga_phos_rv        | /5PHOS/GTTGTTACTACTGATGCCACGA  |
| 1039_ackA_phos-thio_fw   | T*G*CAGTGCATGATGTTAATCA        |
| 1040_ackA_phos_rv        | GATCAGCATAATAATACGGGACAC       |
| 1041_yobF_phos_fw        | GATTTGTGCGTCTGATCGAGA          |
| 1042_yobF_phos-thio_rv   | C*A*TCAGCCGGAGTAATGAAGC        |
| 1043_ptsP_phos_fw        | /5PHOS/CACTGCAGGAAAATACGCCA    |
| 1044_ptsP_phos-thio_rv   | G*C*AGGTTTCAGGCGCTCC           |
| 1045_rfe_phos_fw         | ATGGTAAATTTTTGCACAGGACT        |
| 1046_rfe_phos-thio_rv    | C*C*ACAAGGTACGAAACAACC         |
| 1047_typA_phos_fw        | ACTTGTTTGCGGAGGATGTT           |
| 1048_typA_phos-thio_rv   | A*C*AGACTTATAAGGGAGATACTCGCA   |
| 1049_yciW_phos-thio_fw   | C*C*GCCCGTTATCTCTGTTAT         |
| 1050_yciW_phos_rv        | CTAGCAGCGGGTTGTCCT             |
| 1079_rfe50-BL21-fw       | CTTCGTGGTTATACTTCTGCCA         |
| 1080_rfe50-phos-thio-rv  | A*G*GCATTGGTTGTGTCATCAC        |
| 1081_typA50fw            | TAATCCGTGTACAATAACGCGCT        |
| 1082_typA50-phos-thio-rv | G*G*CAGGTTTTTTATGACTAAAAACGA   |
| 1083_evga50-phos-thio-fw | A*T*TACTACAGGGAGAAGGGAGATGCT   |
| 1084_evga-MG-BL-50rv     | GAAAAATATAGGGTAAAAACTTCATGTGG  |
| 1085_evga-W-50rv         | GAAAAAAATAGGGTAAAAACTTCATGTGA  |
| 1086_ackA50-phos-thio-fw | T*G*GCTCCCTGACGTTTTTTTAGC      |
| 1087_ackA50rv            | GCACCGCCAGCTGAGCTG             |
| 1088_yciW50-phos-thio-fw | C*C*GCCTTGCGTCAGGATAAC         |
| 1089_yciW50rv            | TTTACGCGAATCTGTCTGACG          |
| 1090_yobF50fw            | TTGTATGTGATAACAGATTTCCGGGT     |
| 1091_yobF-phos-thio-50rv | C*C*TTAATCTTTGCCATTTGAA        |
| 1092_ptsP50fw            | AAAACGCATCTGCTTATCGACG         |
| 1093_ptsP-phos-thio-50rv | A*C*CGTTAAAAGATATGTATATGATCCGC |

| Primers for Plasmids     | Sequence                                |
|--------------------------|-----------------------------------------|
| flp_U_pkd46_rv           | AACCTTATAUGCGTCTATTTATGTAGGATGAAAGG     |
| rha_flp_U_fw             | AGAAATACTAGAUGCCACAATTTGGTATATTATGT     |
| rhamSD_AT_U_rv           | ATCTAGTATTTTCUCCTCAATTTTCATTACG         |
| RhaRS_pkd46-U_fw         | ATCTGATTAAUCTTTCTGCGAATTGAGATGAC        |
| pkd46_rha_U_rv           | ATTAATCAGAUCCCTCCGTATTTAGCCAGT          |
| pkd46_flp_U_fw           | ATATAAGGDUCTTATGGCTCTGTATCTATCAGTG      |
| 795_EC_Tn7_down_U_fw     | AGTCAGGUAATGGATGCCCTGCGTAAG             |
| 508_p169-rv              | ACGAACGUCGGCCTCCTGTGTGAAATTG            |
| 833_p8-U_fw              | ACGTTTCGUACTTTTCATACTCCCGCCATTCA        |
| 834_p8_U_rv              | AGCAAGCUACTGGCCTCCTGATGTCGTC            |
| 888_p222-U_fw            | ACCTGACUTATTTTCAGGAAAAGTTTCGGAGGAGATAG  |
| 889_p222-U-rv            | AGCTTGCTCGTAATTATTGGGGACCCCTG           |
| 654_pSIJ180_frt-kan-U-fw | ATGCAAGCUTTCCGTACAGGTAGGCG              |
| 655_pSIJ180_frt-kan-U-rv | ATGAAGUTCCTATTCCGAAGTTCC                |
| 656_pSEVA_U_fw           | ACTTCAUGGGTCCCAATAATTACGATT             |
| 657_pSEVA_gm_U_rv        | ACGCGAUAGCGGAAAAGGACAACGC               |
| 754_seva_spec_frt_U_rv   | AGCTTGCAUAGCGGAAAAGGACAAGGGT            |
| 648_pkd3-4-frt_EMG-U_fw  | ATCTGAAUGTGTAGGCTGGAGCTGCTTC            |
| 649_pkd3-4-frt_EMG-U_rv  | AGCTTGCAUATGAATATCCTCCTTAGTTCCTATTCCGA  |
| 652_pSW-amp-U_fw         | AGTCCCGCUTACCAATGCTTAATCAGTGAGGCAC      |
| 653_pSW-amp-U_rv         | AGCACUCTGACGCCGTTGGATACACC              |
| 411_pEMG_U_fw            | ATGCAAGCUTCTAGGGATAACAGG                |
| 651_pEMG_amp_U_rv        | AGCGGGACUCTGGGGTTC                      |
| 650_pEMG_amp_U_fw        | AGTGCUTGCGGCAGCGTG                      |
| 412_pEMG_U_rv            | ATTCAGAUTACCCTGTTATCCCTATACTG           |
| 887_pSW-508-fw           | ACGTTTCGUTATTTTCAGGAAAAGTTTCGGAGGAGATAG |
| 836_pSW1-U_rv            | ATGCGCUCCTTCTTCGGCTACGTTGTAATCA         |
| 454_xylS_pm_U_fw         | AGCGCAUACCTGCAGGCATGCAAGCT              |
| 508_p169-rv              | ACGAACGUCGGCCTCCTGTGTGAAATTG            |
| 793_EC_Tn7_up_U_fw       | ATCTGAAUGAGCCGTATTGAGCAGATGCT           |
| 794_EC_Tn7_up_U_rv       | AAACCCGUTACTCAACCGTAACCGATTTTGC         |
| 795_EC_Tn7_down_U_fw     | AGTCAGGUAATGGATGCCCTGCGTAAG             |
| 796_EC_Tn7_down_U_rv     | AGCTTGCAUACCCTGGTAGTTAACTTTATTACCGGT    |
| 411_pEMG_U_fw            | ATGCAAGCUTCTAGGGATAACAGG                |
| 412_pEMG_U_rv            | ATTCAGAUTACCCTGTTATCCCTATACTG           |
